# Supplementary material for: Heavier smoking may lead to a relative increase in waist circumference: evidence for a causal relationship from a Mendelian randomisation meta-analysis. The CARTA consortium
Source: HighWire-hosted journal article supplement (doi:10.1136/bmjopen-2015-008808), 2015-08-01
Supplement: bmjopen-2015-008808supp_tableS2.pdf [file bmjopen-2015-008808supp_tableS2.pdf]

**Table S2. Distribution of genotypes for SNP rs1051730/rs16969968, minor allele frequency and p-value from test for Hardy-Weinberg equilibrium (HWE)**

| <b>Study</b>        | <b>Major homozygotes</b> | <b>Heterozygotes</b> | <b>Minor homozygotes</b> | <b>MAF</b> | <b>HWE p-value</b> |
|---------------------|--------------------------|----------------------|--------------------------|------------|--------------------|
| 1958 BC             | 2,178                    | 2,230                | 614                      | 0.34       | 0.4                |
| ALSPAC children     | 740                      | 752                  | 172                      | 0.33       | 0.37               |
| ALSPAC mothers      | 711                      | 664                  | 155                      | 0.32       | 1                  |
| BRHS                | 1,631                    | 1,540                | 405                      | 0.33       | 0.15               |
| BWHHS               | 1,591                    | 1,625                | 399                      | 0.34       | 0.59               |
| Caerphilly          | 523                      | 512                  | 120                      | 0.33       | 0.75               |
| CHDS                | 286                      | 273                  | 55                       | 0.31       | 0.37               |
| CoLaus              | 1,778                    | 1,980                | 547                      | 0.36       | 0.91               |
| Dan-MONICA          | 993                      | 1,000                | 252                      | 0.33       | 0.83               |
| EFSOCH              | 568                      | 523                  | 124                      | 0.32       | 0.82               |
| ELSA                | 2,265                    | 2,169                | 544                      | 0.33       | 0.47               |
| Finrisk             | 9,251                    | 8,979                | 2,138                    | 0.32       | 0.59               |
| GEMINAKAR           | 530                      | 477                  | 113                      | 0.32       | 0.43               |
| Generation Scotland | 3,261                    | 3,251                | 782                      | 0.33       | 0.52               |
| GOYA males          | 443                      | 473                  | 99                       | 0.34       | 0.2                |
| GOYA females        | 338                      | 329                  | 98                       | 0.33       | 0.09               |
| HBCS                | 699                      | 746                  | 181                      | 0.34       | 0.39               |
| Health 2006         | 1,436                    | 1,429                | 346                      | 0.33       | 0.77               |
| Health 2008         | 291                      | 269                  | 64                       | 0.32       | 0.87               |
| HUNT                | 24,621                   | 24,579               | 6,276                    | 0.33       | 0.23               |
| Inter 99            | 2,364                    | 2,423                | 612                      | 0.34       | 0.63               |
| Midspan             | 953                      | 931                  | 215                      | 0.33       | 0.87               |
| NFBC 1966           | 1,711                    | 1,612                | 406                      | 0.33       | 0.38               |
| NFBC 1986           | 554                      | 521                  | 96                       | 0.3        | 0.08               |
| NHANES              | 864                      | 928                  | 253                      | 0.35       | 0.88               |

|                           |       |       |     |      |      |
|---------------------------|-------|-------|-----|------|------|
| NSHD                      | 827   | 760   | 164 | 0.32 | 0.36 |
| NTR                       | 1,727 | 1,607 | 384 | 0.32 | 0.72 |
| PROSPER                   | 2,403 | 2,244 | 498 | 0.31 | 0.56 |
| Whitehall II (phase<br>3) | 1,276 | 1,261 | 299 | 0.33 | 0.50 |
| Whitehall II (phase<br>7) | 1,285 | 1,317 | 319 | 0.33 | 0.50 |
