# Supplementary material for: Heavier smoking may lead to a relative increase in waist circumference: evidence for a causal relationship from a Mendelian randomisation meta-analysis. The CARTA consortium
Source: HighWire-hosted journal article supplement (doi:10.1136/bmjopen-2015-008808), 2015-08-01
Supplement: bmjopen-2015-008808supp_tableS3.pdf [file bmjopen-2015-008808supp_tableS3.pdf]

**Table S3. Per allele percentage increases in measures of regional adiposity measures (fat mass, fat free mass, leptin, adiponectin, arm circumference, triceps skinfold, subscapular skinfold) among never, former and current smokers, before and after adjustment for body mass index**

|                      |                       | ADJUSTED FOR AGE |                |                 | <i>p for interaction</i> | ADJUSTED FOR AGE AND BMI * |                |                 | <i>p for interaction +</i> |
|----------------------|-----------------------|------------------|----------------|-----------------|--------------------------|----------------------------|----------------|-----------------|----------------------------|
|                      |                       | Never smokers    | Former smokers | Current smokers |                          | Never smokers              | Former smokers | Current smokers |                            |
| <b>Fat mass</b>      | % increase            | 0.42             | -0.33          | -0.43           |                          | 0.85                       | -0.31          | -0.43           |                            |
|                      | 95%CI                 | (-0.09, 0.94)    | (-0.93, 0.27)  | (-1.13, 0.28)   |                          | (0.25, 1.45)               | (-0.97, 0.36)  | (-1.13, 0.28)   |                            |
|                      | <i>p</i>              | 0.11             | 0.28           | 0.24            | 0.08                     | 0.005                      | 0.37           | 0.42            | 0.015                      |
|                      | <i>N</i>              | 15,249           | 11,381         | 6,914           |                          |                            |                |                 |                            |
|                      | <i>I</i> <sup>2</sup> | 45%              | 20%            | 6%              |                          | 21%                        | 19%            | 5%              |                            |
| <b>Fat free mass</b> | % increase            | 0.36             | -0.03          | 0.03            |                          | 0.44                       | -0.08          | -0.08           |                            |
|                      | 95%CI                 | (0.09, 0.63)     | (-0.33, 0.28)  | (-0.35, 0.41)   |                          | (0.22, 0.67)               | (-0.34, 0.19)  | (-0.40, 0.25)   |                            |
|                      | <i>p</i>              | 0.008            | 0.86           | 0.89            | 0.13                     | 1.19 x 10 <sup>-4</sup>    | 0.57           | 0.64            | 3.95 x 10 <sup>-3</sup>    |
|                      | <i>N</i>              | 15,543           | 11,511         | 7,011           |                          |                            |                |                 |                            |
|                      | <i>I</i> <sup>2</sup> | 19%              | 0%             | 36%             |                          | 13%                        | 0%             | 24%             |                            |
| <b>Leptin</b>        | % increase            | -0.97            | 0.03           | -3.48           |                          | -0.66                      | -0.38          | -1.36           |                            |
|                      | 95%CI                 | (-3.34, 1.45)    | (-2.32, 2.43)  | (-6.42, -0.44)  |                          | (-2.53, 1.26)              | (-2.24, 1.52)  | (-3.64, 0.98)   |                            |
|                      | <i>p</i>              | 0.43             | 0.98           | 0.025           | 0.2                      | 0.5                        | 0.69           | 0.25            | 0.81                       |
|                      | <i>N</i>              | 8,840            | 8,472          | 6,073           |                          |                            |                |                 |                            |

|                             |            |               |                |                       |                       |               |                |               |       |
|-----------------------------|------------|---------------|----------------|-----------------------|-----------------------|---------------|----------------|---------------|-------|
|                             | $I^2$      | 15%           | 0%             | 5%                    |                       | 0%            | 23%            | 0%            |       |
| <b>Adiponectin</b>          | % increase | -0.04         | -2.96          | -0.31                 |                       | -0.23         | -2.88          | -1.14         |       |
|                             | 95%CI      | (-2.17, 2.13) | (-5.35, -0.51) | (-3.07, 2.54)         | 0.18                  | (-2.30, 1.89) | (-5.22, -0.48) | (-3.81, 1.60) | 0.26  |
|                             | $p$        | 0.97          | 0.18           | 0.83                  |                       | 0.83          | 0.019          | 0.41          |       |
|                             | $N$        | 8,840         | 8,472          | 6,073                 |                       |               |                |               |       |
|                             | $I^2$      | 16%           | 18%            | 2%                    |                       | 18%           | 21%            | 18%           |       |
| <b>Arm circumference</b>    | % increase | 0.11          | -0.17          | -0.4                  |                       | -0.08         | -0.03          | 0.06          |       |
|                             | 95%CI      | (-0.05, 0.27) | (-0.36, 0.02)  | (-0.60, -0.20)        | $3.29 \times 10^{-4}$ | (-0.17, 0.01) | (-0.14, 0.08)  | (-0.05, 0.17) | 0.14  |
|                             | $p$        | 0.17          | 0.08           | $8.40 \times 10^{-5}$ |                       | 0.09          | 0.6            | 0.25          |       |
|                             | $N$        | 32,413        | 20,063         | 20,061                |                       |               |                |               |       |
|                             | $I^2$      | 0%            | 0%             | 0%                    |                       | 0%            | 46%            | 0%            |       |
| <b>Triceps skinfold</b>     | % increase | 0.86          | 1.98           | -2.14                 |                       | -0.64         | 1.98           | -1.6          |       |
|                             | 95%CI      | (-1.05, 2.81) | (-0.18, 4.18)  | (-5.31, 1.13)         | 0.12                  | (-2.17, 0.90) | (0.12, 3.87)   | (-3.92, 0.79) | 0.034 |
|                             | $p$        | 0.38          | 0.072          | 0.2                   |                       | 0.41          | 0.037          | 0.19          |       |
|                             | $N$        | 3,234         | 3,064          | 1,460                 |                       |               |                |               |       |
|                             | $I^2$      | 71%           | 0%             | 0%                    |                       | 42%           | 0%             | 0%            |       |
| <b>Subscapular skinfold</b> | % increase | -0.16         | -0.93          | -2.29                 |                       | 0.14          | -0.41          | -1.23         |       |
|                             | 95%CI      | (-2.14, 1.87) | (-2.83, 1.01)  | (-5.54, 1.06)         | 0.55                  | (-1.01, 1.31) | (-1.89, 1.10)  | (-3.29, 0.87) | 0.55  |
|                             | $p$        | 0.88          | 0.34           | 0.18                  |                       | 0.81          | 0.59           | 0.25          |       |

|                       |       |       |       |    |    |    |
|-----------------------|-------|-------|-------|----|----|----|
| <i>N</i>              | 3,234 | 3,064 | 1,460 |    |    |    |
| <i>I</i> <sup>2</sup> | 56%   | 0%    | 8%    | 0% | 0% | 3% |

\*adjustment only made for age and height for fat mass and fat free mass

+Interaction assessed by assessing heterogeneity between effect estimates according to smoking status, with fixed effects model
